# Supplementary material for: Anti-cancer Drug Response Prediction Using Neighbor-Based Collaborative Filtering with Global Effect Removal
Source: PubMed Central journal article supplement (PMC6197792; doi:10.1016/j.omtn.2018.09.011), 2018-09-22
Supplement: mmc1.pdf [file mmc1.pdf]

**OMTN, Volume 13**

**Supplemental Information**

**Anti-cancer Drug Response Prediction Using  
Neighbor-Based Collaborative Filtering  
with Global Effect Removal**

**Hui Liu, Yan Zhao, Lin Zhang, and Xing Chen**

## Supplemental Figures

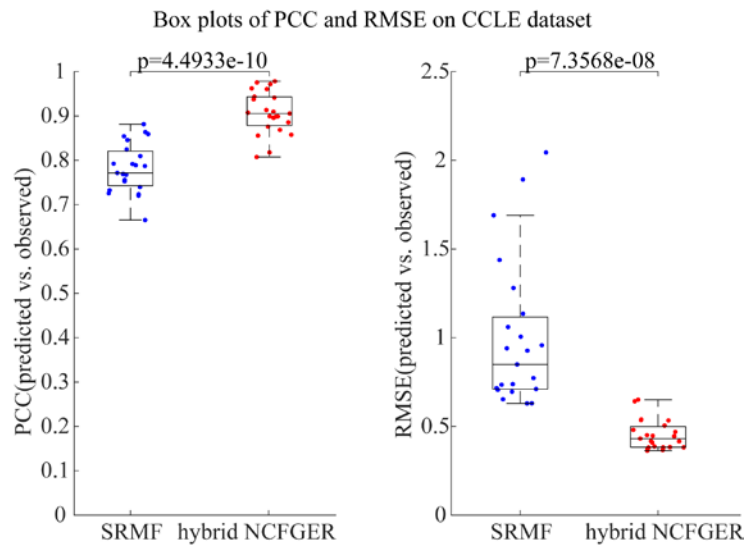

**Fig. S1.** Box plots of SRMF and our proposed method on CCLE dataset with respect to different evaluation metrics.

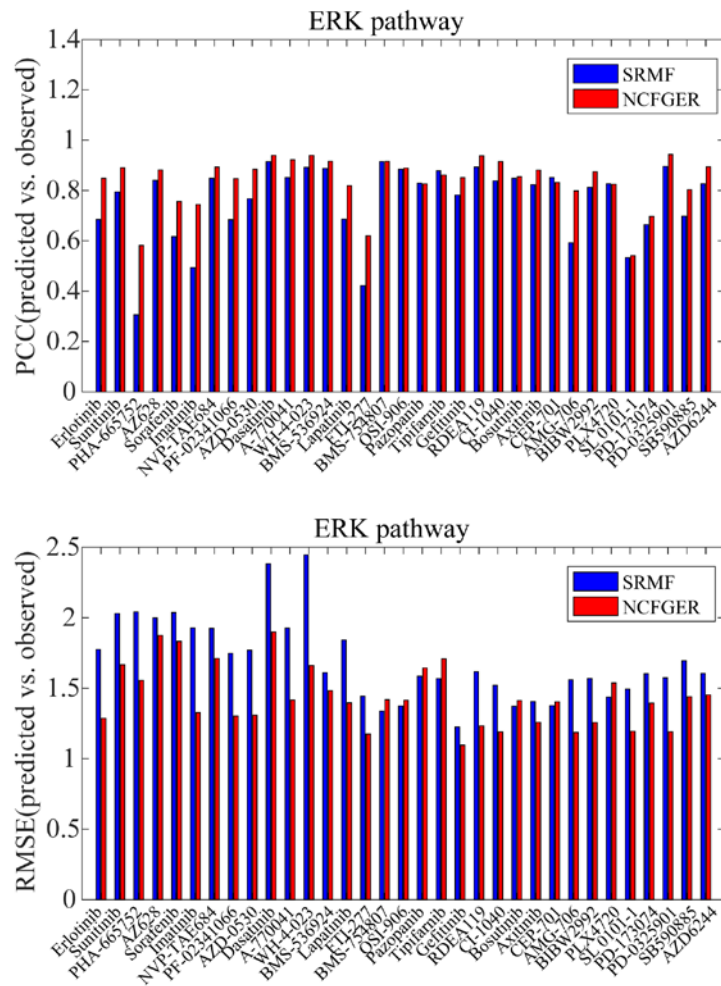

**Fig.S2.** Prediction performance comparisons of SRMF and NCFGER for the drug targeting genes in ERK pathway with respect to PCC as well as RMSE in CCLE dataset.

## Supplemental Tables

**Table S1.** The comparison results between hybrid NCFGGER with different similarity definition and SRMF obtained under 10-fold cross validation on GDSC dataset

| Methods |              | Drug-averaged<br>PCC_S/R | Drug-averaged<br>RMSE_S/R | Drug-averaged<br>PCC | Drug-averaged<br>RMSE |
|---------|--------------|--------------------------|---------------------------|----------------------|-----------------------|
| NCFGGER | <i>COEF</i>  | 0.78( $\pm$ 0.13)        | 1.58( $\pm$ 0.34)         | 0.70( $\pm$ 0.14)    | 1.27( $\pm$ 0.26)     |
|         | <i>RPCC</i>  | 0.81( $\pm$ 0.11)        | 1.42( $\pm$ 0.29)         | 0.73( $\pm$ 0.13)    | 1.18( $\pm$ 0.24)     |
|         | <i>MRPCC</i> | 0.81( $\pm$ 0.11)        | 1.42( $\pm$ 0.29)         | 0.73( $\pm$ 0.13)    | 1.18( $\pm$ 0.24)     |
| SRMF    |              | 0.71( $\pm$ 0.15)        | 1.73( $\pm$ 0.46)         | 0.62( $\pm$ 0.16)    | 1.43( $\pm$ 0.36)     |

**Table S2.** The comparison results between hybrid NCFGGER with different similarity definition and SRMF obtained under 10-fold cross validation on CCLE dataset

| Methods |              | Drug-averaged<br>PCC_S/R | Drug-averaged<br>RMSE_S/R | Drug-averaged<br>PCC | Drug-averaged<br>RMSE |
|---------|--------------|--------------------------|---------------------------|----------------------|-----------------------|
| NCFGGER | <i>COEF</i>  | 0.89( $\pm$ 0.05)        | 0.47( $\pm$ 0.09)         | 0.85( $\pm$ 0.07)    | 0.39( $\pm$ 0.07)     |
|         | <i>RPCC</i>  | 0.91( $\pm$ 0.05)        | 0.45( $\pm$ 0.08)         | 0.86( $\pm$ 0.06)    | 0.38( $\pm$ 0.06)     |
|         | <i>MRPCC</i> | 0.91( $\pm$ 0.05)        | 0.45( $\pm$ 0.08)         | 0.86( $\pm$ 0.06)    | 0.38( $\pm$ 0.06)     |
| SRMF    |              | 0.78( $\pm$ 0.07)        | 0.74( $\pm$ 0.23)         | 0.71( $\pm$ 0.09)    | 0.57( $\pm$ 0.18)     |

**Table S3.** The comparison results of both methods obtained under 10-fold cross validation on CCLE dataset

| Methods |                | Drug-averaged<br>PCC_S/R | Drug-averaged<br>RMSE_S/R | Drug-averaged<br>PCC | Drug-averaged<br>RMSE |
|---------|----------------|--------------------------|---------------------------|----------------------|-----------------------|
| NCFGGER | Hybrid         | 0.91( $\pm$ 0.05)        | 0.45( $\pm$ 0.08)         | 0.86( $\pm$ 0.06)    | 0.38( $\pm$ 0.06)     |
|         | cellline-based | 0.85( $\pm$ 0.08)        | 0.51( $\pm$ 0.06)         | 0.78( $\pm$ 0.09)    | 0.47( $\pm$ 0.08)     |
|         | Drug-based     | 0.80( $\pm$ 0.07)        | 0.63( $\pm$ 0.20)         | 0.73( $\pm$ 0.09)    | 0.52( $\pm$ 0.16)     |
| SRMF    |                | 0.78( $\pm$ 0.07)        | 0.74( $\pm$ 0.23)         | 0.71( $\pm$ 0.09)    | 0.57( $\pm$ 0.18)     |
